# Supplementary material
Source: publisher figshare collection journal article supplement (https://gsapubs.figshare.com/ndownloader/files/30834412)
Supplement: Supplementary file 1 [file 30834412]

## Sheet: Sheet1
Supplementary Table 5
Major and trace elements data for the Daocheng batholith.
Lithology	MME I				MME II				Quartz diorite			Granodiorite				Monzogranite
Sample no.	18DC43	18DC44	18DC48	18DC49	18DC54	18DC64	18DC65	18DC66	18DC35	18DC45	18DC46	18DC42	18DC47	18DC50	18DC51	18DC29	18DC41	18DC52	18DC53	18DC63	18DC67	18DC68	18DC69
Major elements (wt. %)
SiO2	49.685	55.541	50.332	48.425	60.078	57.992	61.403	51.821	58.13	58.879	61.674	61.256	62.664	62.473	63.669	70.835	70.073	70.805	70.987	69.853	73.621	73.772	73.53
TiO2	1.078	0.865	0.755	1.033	0.804	0.698	0.871	1.218	0.759	0.729	0.693	0.666	0.657	0.621	0.56	0.258	0.292	0.368	0.385	0.462	0.23	0.288	0.186
Al2O3	19.43	18.254	16.249	19.362	16.78	15.488	14.967	17.853	17.796	17.144	16.598	16.919	16.211	16.703	16.112	14.74	15.072	14.155	14.267	14.677	13.5	13.088	13.67
TFe2O3	10.187	7.988	10.692	9.942	7.116	7.915	7.17	10.996	5.353	6.518	5.709	5.625	5.36	5.214	4.948	2.382	2.776	3.033	3.094	3.56	2.087	2.437	1.87
MnO	0.193	0.139	0.25	0.171	0.144	0.199	0.164	0.226	0.234	0.121	0.102	0.1	0.096	0.091	0.092	0.063	0.054	0.059	0.061	0.065	0.044	0.056	0.047
MgO	4.433	3.675	6.383	5.308	2.485	2.833	3.044	3.106	2.739	3.726	2.886	2.891	2.833	2.794	2.525	0.988	0.637	0.818	1.146	1.306	0.451	0.519	0.349
CaO	7.479	6.781	9.585	8.007	4.265	6.364	6.238	6.298	5.874	6.92	5.968	6.067	5.425	5.851	5.426	2.88	2.537	2.649	3.137	3.366	1.694	2.045	1.615
Na2O	3.51	3.213	2.743	2.991	4.565	3.347	3.12	3.881	5.467	2.904	2.938	2.828	2.806	2.779	2.821	3.563	3.747	3.279	3.08	3.192	2.822	3.04	2.958
K2O	2.51	2.303	1.29	2.645	2.253	3.825	1.608	2.613	2.287	1.762	2.256	2.276	2.955	2.57	2.725	3.832	3.402	3.39	3.335	2.699	5.085	3.985	4.762
P2O5	0.395	0.171	0.203	0.491	0.147	0.1	0.119	0.233	0.368	0.18	0.168	0.111	0.181	0.151	0.149	0.094	0.073	0.065	0.068	0.08	0.046	0.064	0.038
LOI	0.95	0.877	1.037	1.06	1.142	0.839	0.988	0.898	0.942	0.96	0.885	1.451	0.779	0.674	0.708	0.514	0.464	0.501	0.348	0.66	0.486	0.566	0.468
Total	99.85	99.807	99.519	99.435	99.779	99.6	99.692	99.143	99.949	99.843	99.878	100.19	99.967	99.921	99.735	100.149	99.127	99.122	99.908	99.92	100.066	99.86	99.493
Na2O+K2O	6.02	5.516	4.033	5.636	6.818	7.172	4.728	6.494	7.754	4.666	5.194	5.104	5.761	5.349	5.546	7.395	7.149	6.669	6.415	5.891	7.907	7.025	7.72
A/CNK	0.878597	0.906774	0.695356	0.865578	0.947054	0.729202	0.820734	0.863065	0.8	0.888763	0.914663	0.931274	0.916018	0.927332	0.922018	0.966131	1.04167	1.01907	0.99131	1.02602	1.02008	1.0036	1.05443
A/NK	2.28794	2.34639	2.74964	2.48719	1.68648	1.60529	2.17732	1.93755	1.55	2.56438	2.28111	2.37727	2.07408	2.27106	2.12234	1.47	1.53045	1.56147	1.644	1.79561	1.33022	1.40486	1.3639
Mg#	46.295	47.6811	54.1829	51.3999	40.8901	41.4872	45.6816	35.8787	50.3375	53.1043	50.0348	50.4486	51.1482	51.4918	50.2705	45.1045	31.2505	34.8218	42.3207	42.0864	29.9758	29.6701	26.9914
Trace elements (ppm)
Li	65.7222	37.049	21.0629	46.1998	57.7897	36.3467	46.1131	60.1411	33.0268	26.8559	34.7988	24.7476	31.9069	27.1296	31.3684	28.1432	36.1433	36.3571	32.5704	35.1559	34.8203	54.0413	49.0862
Be	2.28543	1.97399	2.02022	2.15992	3.87489	1.80571	1.87475	3.17336	7.2335	1.78348	1.9297	1.40917	1.87332	1.86963	1.93917	2.66557	2.5132	1.84297	2.08653	2.10041	1.87005	2.76585	1.96822
B	12.9859	13.351	17.2711	13.5462	20.0211	15.056	16.0841	18.0095	18.7917	16.2231	18.5884	15.8387	14.8747	44.0428	15.7469	14.2141	14.2653	14.7236	14.9053	13.3959	18.2429	22.1374	21.9336
Sc	26.1841	26.1571	40.8675	27.5315	20.3026	24.3286	25.4476	33.6953	13.6652	25.5581	18.1092	18.492	16.7482	15.9967	15.7896	5.04338	7.2331	6.66594	8.70822	9.61417	6.47987	7.77808	4.92408
V	164.281	205.951	223.454	267.456	125.182	105.895	118.81	100.894	151.678	141.39	123.93	122.128	117.794	118.756	112.326	51.6141	25.9677	29.6359	40.2783	44.6792	18.548	25.0594	14.4438
Cr	30.3699	6.85151	163.109	33.4715	13.1105	11.1845	83.0575	7.74444	2.28445	52.8775	28.1748	22.7034	26.4921	25.7829	22.0371	4.65844	3.5193	5.84347	18.8983	20.2512	5.45222	4.4842	3.09134
Co	20.6341	18.6988	24.3658	25.5813	13.5147	15.1392	16.4669	18.9741	9.07504	15.8436	13.2945	14.531	12.4157	12.606	11.1034	4.53591	3.73633	4.96576	6.43485	7.52219	2.81196	3.27973	2.22721
Ni	14.9645	6.82525	28.8077	17.7303	9.66993	8.51808	22.2521	9.43674	6.83282	14.1206	9.78884	9.4483	10.1102	9.5334	8.40228	3.29211	2.23639	3.06275	6.3843	7.18467	2.45083	2.41091	1.80374
Cu	23.5227	22.422	37.3568	79.6292	6.34707	39.1726	25.0502	5.73713	2.70102	14.9579	9.51608	7.08824	8.17835	9.07557	5.15281	1.04879	1.11389	1.88705	3.77946	4.14216	1.1879	1.25939	0.827825
Zn	94.9985	73.3567	91.7477	92.1327	83.3677	81.0318	77.7472	125.117	37.2538	64.8213	56.0045	52.1632	51.1235	50.7328	48.3326	17.3416	32.5355	38.7518	37.2037	41.0955	29.1194	35.2864	26.9464
Ga	23.4183	20.6176	19.1508	23.0651	22.0904	18.0538	18.9011	25.7965	24.1193	19.5943	19.5	17.7294	17.6465	18.0344	17.0049	16.0224	18.6024	16.0031	15.4459	16.958	15.4601	16.1566	14.9562
Rb	127.895	112.473	59.9375	149.141	189.434	180.306	124.767	207.208	100.85	70.6046	96.2174	84.1898	103.283	98.1351	99.3157	158.002	134.864	133.892	129.867	119.751	180.46	186.907	184.577
Sr	384.658	301.554	350.029	418.443	123.047	178.831	164.364	156.746	371.079	415.477	410.462	269.034	427.386	418.507	404.557	417.066	233.054	140.153	144.586	148.11	113.508	113.154	107.494
Y	50.0732	33.1198	51.6406	34.4817	56.7741	40.7868	33.4437	39.3114	55.9008	34.4774	24.8605	20.2552	20.8617	17.7044	19.2048	16.0317	24.8725	23.9409	23.5409	26.4078	21.906	38.4218	17.0591
Zr	134.561	127.827	121.619	220.297	218.749	133.916	174.124	229.434	144.852	155.819	152.523	132.067	164.333	144.697	135.134	124.773	182.964	149.225	152.789	155.852	124.322	148.975	116.915
Nb	19.9427	13.4537	12.8933	16.9774	22.8805	13.205	16.4362	24.1118	36.9341	11.9044	11.3253	8.37112	11.1384	10.4581	10.0211	10.4529	12.3799	10.1885	9.42496	11.3706	10.8671	11.9927	9.03385
Sn	1.59737	1.73013	3.24048	2.98721	5.29649	3.73582	2.24376	5.28545	1.92718	0.822911	1.57292	1.62943	1.841	1.93143	1.9057	0.672703	2.28958	2.07693	2.4081	2.25978	2.6755	6.44394	3.18696
Cs	4.99092	3.39336	2.05263	5.1088	7.60557	10.3599	5.48101	12.771	8.57226	3.92218	7.80632	3.08636	4.74402	3.41532	3.41087	4.45159	4.41351	3.61926	3.70096	3.88694	3.594	6.22573	4.59436
Ba	718.14	524.262	204.217	572.198	283.213	1875.15	402.605	749.015	228.194	645.75	628.649	507.633	970.014	825.05	729.949	926.803	800.307	614.41	535.138	490.303	639.446	399.335	582.116
La	17.3873	30.154	20.1751	26.8037	11.2169	12.2833	12.5926	17.7198	21.2636	21.4672	19.8648	21.7401	33.4391	34.7709	21.4133	37.7986	31.7727	29.4149	21.7978	38.4762	29.0904	27.6166	23.827
Ce	52.4224	59.3951	62.2374	64.1425	27.5752	28.214	30.1956	40.156	52.6244	49.9774	42.5664	41.9532	61.9408	62.5828	42.6255	65.082	58.0904	54.5908	41.6069	71.9344	58.1775	55.6676	46.8037
Pr	8.49354	6.96557	9.66811	8.5381	4.17144	4.01057	4.3132	5.23977	7.42339	6.67842	5.36071	4.72902	6.85835	6.47059	5.02549	6.39636	6.11658	5.79189	4.53826	7.50896	6.40592	6.32376	5.23684
Nd	40.3103	27.2164	44.0473	35.785	19.7179	19.3795	20.1485	23.139	33.1197	29.1519	22.0971	17.6684	25.3044	23.5789	19.8009	21.6504	21.1335	20.4746	17.5401	26.0205	23.4139	23.7769	19.3327
Sm	10.2127	5.91364	10.473	7.75812	6.25323	6.38244	5.83205	6.50229	8.9273	6.60964	5.08306	3.7498	4.8784	4.13838	4.18792	3.6864	4.24835	4.02592	3.65945	5.12958	5.06014	5.77194	4.19894
Eu	1.34633	1.07781	1.55827	1.36739	0.727152	1.02886	0.88339	0.923614	0.907678	1.19854	1.18693	0.962971	1.20024	1.16635	1.07474	0.697821	0.720001	0.823205	0.826251	0.851135	0.672523	0.671513	0.696465
Gd	10.0455	6.08477	10.2461	7.48479	7.43707	7.0322	5.91436	6.65251	8.87364	6.98149	4.88916	3.67367	4.32169	3.72718	3.95172	2.8284	4.15333	3.9622	3.72408	4.31553	4.19967	5.43546	3.26815
Tb	1.4574	0.924585	1.44134	0.983725	1.23932	1.12394	0.932014	1.00806	1.35329	1.02926	0.721387	0.558488	0.608368	0.548774	0.541385	0.417088	0.667484	0.613554	0.595173	0.688612	0.641835	0.94274	0.460977
Dy	9.14387	5.72121	8.84752	5.90969	8.77684	7.36247	5.93872	6.6526	8.59804	6.12475	4.3874	3.35818	3.66036	3.11313	3.24247	2.51329	4.01805	3.83278	3.81238	4.23277	3.80287	6.09406	2.78102
Ho	1.82231	1.1856	1.84614	1.18397	1.83593	1.4635	1.15239	1.28421	1.76102	1.27593	0.883408	0.727325	0.727202	0.621054	0.662096	0.483675	0.84944	0.823099	0.785434	0.849385	0.731153	1.19464	0.548702
Er	5.03773	3.47993	5.23414	3.39261	5.51519	4.12854	3.31141	3.81174	5.39388	3.3884	2.47624	2.0093	2.12978	1.77948	1.85309	1.50881	2.49644	2.33902	2.30116	2.50018	2.00199	3.64289	1.58802
Tm	0.705138	0.50618	0.805689	0.505178	0.894494	0.576884	0.47676	0.56388	0.891256	0.526296	0.394012	0.304963	0.306922	0.273256	0.293938	0.264842	0.394484	0.3608	0.366514	0.366863	0.298518	0.535798	0.236863
Yb	4.2323	3.21063	5.10373	3.2898	6.0771	3.72063	2.96713	3.9118	6.08574	3.01988	2.44242	1.94199	1.93216	1.74234	1.86937	1.71775	2.57351	2.28327	2.23918	2.3724	1.87319	3.42411	1.51825
Lu	0.600289	0.478425	0.788217	0.489757	1.00684	0.558767	0.430129	0.589921	0.97456	0.457213	0.375998	0.31851	0.308313	0.323625	0.297049	0.273031	0.37381	0.374571	0.391455	0.375675	0.286128	0.536882	0.255021
Hf	3.52284	3.51433	3.72953	5.23725	7.02876	3.35303	4.50539	5.30689	4.57355	4.12818	3.91137	3.47299	4.31393	3.92891	3.78231	3.67459	4.87063	4.10603	4.26928	4.23621	3.5172	4.38949	3.35708
Ta	0.923855	0.967941	0.787732	0.952389	3.05452	0.813277	0.958651	1.47971	3.12104	0.589609	0.781898	0.67077	0.833461	0.752094	0.821025	0.985041	1.05095	0.898867	0.941628	1.07132	0.960619	1.34695	0.794592
Tl	0.654983	0.54485	0.304331	0.801099	0.906781	0.885668	0.71912	1.10823	0.370558	0.35377	0.450227	0.423932	0.530153	0.529515	0.52534	0.59199	0.631312	0.636273	0.596903	0.633604	0.943932	1.00169	0.978844
Pb	11.3963	10.8281	9.91148	10.7986	22.071	21.8033	10.9447	13.2595	9.34964	9.3267	11.1713	11.9259	14.6329	13.931	14.416	8.71056	13.6729	17.6578	18.2557	17.0682	28.8929	27.4039	27.5193
Th	1.17048	10.0498	2.12292	6.16022	11.2122	7.28285	3.30579	6.52154	13.9601	4.12128	6.56886	9.70339	12.7554	13.4827	10.0522	28.2729	17.0096	12.8979	11.5138	17.1926	17.4082	17.0913	12.1256
U	3.66552	1.52962	1.12323	2.09627	4.97633	2.47115	1.10332	2.62083	13.157	1.2441	2.25273	1.82956	2.44373	1.98968	2.52329	6.29232	2.67179	2.50203	2.39251	3.84045	3.22793	4.42231	1.94343
A/NK = Al2O3/(Na2O+K2O) molar, A/CNK = Al2O3/(CaO+Na2O+K2O) molar
Mg# = 100×molar Mg/(Mg+Fe).
